# An ancient FMRFamide-related peptide-receptor pair induces defense behavior in a brachiopod larva

Daniel Thiel<sup>1</sup>, Philipp Bauknecht<sup>2</sup>, Gáspár Jékely<sup>2</sup> and Andreas Hejnowski<sup>1</sup>

**1** Sars International Centre for Marine Molecular Biology, University of Bergen, Thormøhlensgate 55, 5006 Bergen, Norway. **2** Max Planck Institute for Developmental Biology, Spemannstraße 35, 72076 Tübingen, Germany.

## Abstract

Animals show different behaviors that can consist of various spatially or temporally separated sub-reactions. Even less complex organisms, like ciliated larvae that display important behaviors (e.g. metamorphosis, defense, feeding), need to coordinate coherent sub-reactions with their simple nervous system. These behaviors can be triggered by neuropeptides, which are short signaling peptides. Despite the high diversity of neuropeptides in animals, and although their immunoreactivity is widely used in morphological studies of animal nervous systems (e.g. FMRFamide), their function and role in trochozoan larval behavior has so far only been tested in a few cases. When mechanically disturbed, the planktonic larvae of the brachiopod *Terebratalia transversa* protrude their stiff and pointy chaetae in a defensive manner and sink down slowly: a startle reaction that is known from different chaetous trochozoan larvae. We found that both of these reactions can be induced simultaneously by the FMRFamide-related neuropeptide FLRFamide. We deorphanized the *Terebratalia* FLRFamide receptor and found its expression spatially separated in the apical lobe at the prototroch of the larvae and in the trunk musculature, which correlates with the tissues that are responsible to perform the two sub-reactions. A behavioral assay showed a decreasing efficiency of modified peptides in triggering this behavior, which correlates with the decreasing efficiency of activating the FLRFamide receptor in transfected CHO-K1 cells. Immunohistochemistry and *in situ* hybridization show FLRFamidergic neurons in the apical lobe as well as next to the trunk musculature. Our results show that the single neuropeptide FLRFamide can specifically induce the two coherent sub-reactions of the *T. transversa* startle behavior.

## Introduction

Planktonic organisms evolved different strategies to defend themselves from predation [1-4]. Morphological characters like shells, spines or chaetae [5-7] and behaviors such as vertical migration, contraction, active fleeing or passive sinking [8-11] can help to cope with certain predators. This is especially true for ciliated larvae that do not possess an elaborated nervous system and face the challenge of remaining in the water column for dispersal while avoiding predation. The startle behavior of several planktonic annelid and brachiopod larvae has often been described as a major defense strategy, where they stop swimming and protrude long and pointy chaetae [12-16]. The co-occurring sub-reactions of spreading the chaetae and stopping swimming take place in spatially separated tissues: the internal trunk musculature and the ciliated apical edge, respectively. Both sub-reactions have to be coordinated within the framework of a larval nervous system. One mechanism to achieve coordination of different

reactions could be the use of neuropeptides as signaling molecules. Neuropeptides are known to influence many behaviors and can be crucial in the regulation and coordination of spatially or temporally separated coherent sub-reactions. During insect ecdysis for example, the eclosion hormone and the ecdysis-triggering hormone act both as a form of master-regulator on different peripheral as well as central targets, and each coordinates several sub-reactions [17-20]. Another example is neuropeptide Y which stimulates appetitive as well as consummatory ingestive behavior in the Siberian hamster [21]. In *Platynereis dumerilii*, myoinhibitory peptide first triggers settlement of the non-feeding larvae and later in development stimulates food intake in juveniles [22, 23].

Only a few studies have demonstrated the influence of neuropeptides on the behavior of trochozoan larvae: these studies show that neuropeptides can trigger settlement and influence their ciliary based locomotion [22, 24-26]. One of the neuropeptides that has been shown to influence ciliary beating of different trochozoan larvae is FMRFamide [24-26]. FMRFamide-immunoreactivity is widely used as a marker for neural substructures in morphological studies [27, 28]. Furthermore, while FMRFamide related peptides (FaRPs) have been identified in many metazoans, their phylogenetic relationship is difficult to reconstruct [29-31]. For the comparison of larval nervous systems it is therefore of crucial interest to understand the functional role of a neuropeptide and its versatility to trigger larval behaviors.

While experimental studies in trochozoan larvae are limited, the physiological effect of FMRFamide has been intensively investigated in adult trochozoans where it showed to have various muscular effects [32-36]. Depending on the species, it can increase or decrease the heartbeat [32], cause contractions or relaxation of somatic muscles [33-35] or change the efficiency of classical neurotransmitters on somatic muscles [37, 38]. So far only one study has shown a muscular effect of FMRFamide in larvae, which describes a twitching of the ciliated velum of *Tritia obsoleta* larvae [24]. Many immunohistochemical analyses on trochozoan larvae show FMRFamide-like immuno-reactivity associated with muscles or ciliary bands [39-41] but experimental data are mostly missing.

Since neuropeptides can act over longer distances [42], the localization of the neuropeptide receptor provides more information about the actually effected tissues than the peptide secreting cells that are labeled with the peptide antibodies. The majority of neuropeptide receptors are G-protein coupled receptors (GPCRs), with a few exceptions like insulin receptors or peptide gated ion channels [30, 43, 44]. For FMRFamide, there have been three different receptors deorphanized in invertebrates so far. One is an FMRFamide-gated amiloride-sensitive Na<sup>+</sup> channel (FaNaCh) that has been identified in molluscs [45-47]. The two other receptors belong to two different groups of neuropeptide GPCRs. One of these FMRFamide-GPCRs was identified in the fruit fly *Drosophila melanogaster* [48, 49] and the other one in the annelid *P. dumerilii* [44]. This stands in contrast to many cases in which homologous ligands activate homologous receptors [44, 50, 51].

Here we show that the endogenous FaRP FLRFamide induces the characteristic defense behavior in the larvae of the brachiopod *Terebratalia transversa*, which consists of a downward sinking and the protrusion of their chaetae. Behavioral experiments and receptor deorphanization in combination with immunohistochemistry and *in situ* hybridization show that both coherent sub-reactions are specifically triggered by a single peptide via an ancient FaRP receptor. Together our results show how a single neuropeptide can trigger two coherent reactions and integrate evolutionary novelties such as trochozoan chaetae [52] into the *T. transversa* larval defense behavior.

## Material and Methods

### Collection and rearing of *Terebratalia transversa* larvae

Adult *T. transversa* (Sowerby, 1846) were collected in January by dredging in approximately 50-100 meter depth close to University of Washington's Friday Harbor Laboratories, San Juan Islands. Larvae were obtained according to [53] by artificial fertilization and kept at 8-10°C. We used early larvae (2 days post fertilization) before chaetal formation and late larvae (4-5 days post fertilization) with clearly developed mantle lobes and long chaetae. For immunohistochemistry and *in situ* hybridization, larvae were relaxed in 7.8% MgCl<sub>2</sub>-6H<sub>2</sub>O for 10-15 min, fixed in 4% methanol-free formaldehyde in seawater for 1h, subsequently washed in PBS + 0.1% Tween and transferred into 100% methanol for storage at -20°C.

### Bioinformatics

The previously published transcriptome of *T. transversa* (Accession: SRX1307070) was queried for peptide precursor and receptor candidates using BLAST. For reference sequences, we used published FMRFamide like peptide precursor sequences from NCBI and checked candidates for signal peptides, cleavage sites and amidation sites. As reference sequences for the peptide receptor we used previously published collections [30, 44] and included transcriptomes of *Xenoturbella bocki* (Accession: SRX1343818), *Nemertoderma westbladi* (Accession: SRX1343819), *Meara stichopi* (Accession: SRX1343814) and *Halicryptus spinulosus* (Accession: SRX1343820) for additional sequences. The candidates were compared using the software CLANS [54] with a p-value cutoff of 1e-70. Sequences that were strongly connected in the cluster map were aligned with Clustal X v.2.1 [55], unconserved stretches were deleted manually and the best fitting amino acid substitution matrix was determined with Modelgenerator v.0.85 [56]. The final phylogenetic analysis was calculated with PhyML v3.0 [57] with 500 bootstrap replicates and visualized with Figtree v1.4.3 (<http://tree.bio.ed.ac.uk/software/figtree>).

### Behavioral assay

We tested synthetic peptides (GenScript) that were predicted from the prepropeptide sequence and compared the reaction with non-native modifications of those.

To determine the efficiency of the native and modified peptides we tested at which concentration larvae contracted and spread their chaetae. To get an estimation of the peptide concentration that was necessary to induce a complete contraction we exposed larvae to a concentration of 50 nmol/l of the respective peptide and increased the concentration stepwise until the larvae contracted or a concentration of 50  $\mu$ mol/l was reached as an upper cutoff. Larvae were considered fully contracted when their chaetae were spread in all directions (fig.1 C). In addition to this, they did not further increase in contraction following an increase in peptide concentration, or followed by the use of the most sensitive peptide. Using this approximate concentration, we then tested fixed concentrations to narrow down the sensitivity window. Each test was performed with 30-100 larvae.

The vertical swimming experiments were recorded in 4.5 ml cuvettes with 50-100 larvae per cuvette, in a darkened box with top-illumination. About 1 minute after addition of the peptide in the treatments and water/DMSO in the controls we recorded the larval swimming (DMK 31AU03 camera, Imaging Source).

All experiments were repeated with at least one different batch of larvae from another fertilization and the outcome was averaged afterwards.

### **Receptor deorphanization**

For deorphanization we followed the procedure used by [44]: Full length ORFs of receptor candidate sequences were cloned into pcDNA3.1(+) mammalian expression vector (Sigma-Aldrich) and transfected into CHO-K1 cells together with a calcium sensitive luminescent apoaequorin-GFP fusion protein encoding plasmid (G5A) and a promiscuous Gα-16 protein encoding plasmid. After two days, coelenterazine h (Promega, Madison, WI, USA) was added and incubated with the cells for two hours. The luminescence response of the transfected cells was measured in a plate reader (BioTek Synergy Mx or Synergy H4, BioTek, Winooski, USA) over 45 seconds after addition of the neuropeptides. The response of the cells to 1 mM Histamine was used as a general control in each plate. All measurements for the dose response curves were made twice with different cell passages. Dose response curves were calculated using Prism 6 (GraphPad, La Jolla, USA) and normalized against the upper plateau values (100% activation).

### ***In situ* hybridization**

FLRFamide precursor and receptor sequences were amplified by PCR and cloned into pGEM Teasy vector (Promega) for *in vitro* transcription of DIG-UTP or DNP-UTP labeled RNA probes. For Tropomyosin we used a previously published clone [58]. The *in situ* hybridization protocol with an alternative hybridization buffer will be published elsewhere (Sinigaglia et al. 2017 - unpublished). In general we followed the protocol from [59] with following adjustments: Proteinase K treatment (10 µg/ml) was adjusted to 8 minutes and the following postfixation was done in 3.7% Formaldehyde + 0.2% Glutaraldehyde in PBS + 0.1% Tween 20. The hybridization buffer contained 4 mol/l Urea, 5x SSC, 1% Dextran, 1% SDS, 50 µg/ml Heparin, 50 µg/ml single stranded DNA and no Formamide. The signal was developed with the TSA Plus Cy3 or Cy5 kit (Perkin Elmer) or NBT/BCIP as a substrate and detected via fluorescence or NBT/BCIP reflection [60] in a Leica SP5 confocal laser-scanning microscope.

### **Immunohistochemistry**

Customized polyclonal antibodies were raised in rabbits against CFLRFamide, coupled via a disulfide bridge to Keyhole limpet hemocyanin (GenScript®). Co-staining was either done with mouse anti-acetylated α-tubulin (Sigma, T6793) or mouse anti-actin (Seven Hills Bioreagents, LMAB-C4) antibodies. For immuno-staining we followed the protocol of [61] with the following adjustments: Proteinase K treatment (10 µg/ml) was done for 3-5 minutes and after the proteinase inactivation step with glycine (2 mg/ml) the samples were incubated for 2-4h in PBS + 0.5% TritonX. Primary antibodies were incubated over 3 nights at 4°C and washed for 4-6 hours with at least 10 changes of washing medium. Secondary antibodies were incubated over night and included a secondary antibody without primary partner (goat anti rat) to test and subtract unspecific background staining. After washing the secondary antibodies for 4-6 hours with at least 10 changes of buffer, specimens were transferred into methanol and mounted in Murray's clear (2:1 parts benzyl-benzoate : benzyl-alcohol).

## Results

### The endogenous neuropeptide FLRFamide triggers the defense behavior of *T. transversa* larvae

During normal swimming the chaetae of competent *T. transversa* larvae rest against their pedicle lobe with their tips forming a bundle (fig.1 A). When the larvae get disturbed (e.g. mechanical irritation with a pipette tip) they stop swimming, sink down slowly and exhibit a defensive stance by lengthwise contraction of their body to spread the 4 bundles of chaetae outwards (fig.1 B,C,E). At maximal contraction the larvae spread their chaetae likewise in all directions to surround their soft body (fig.1 C,E).

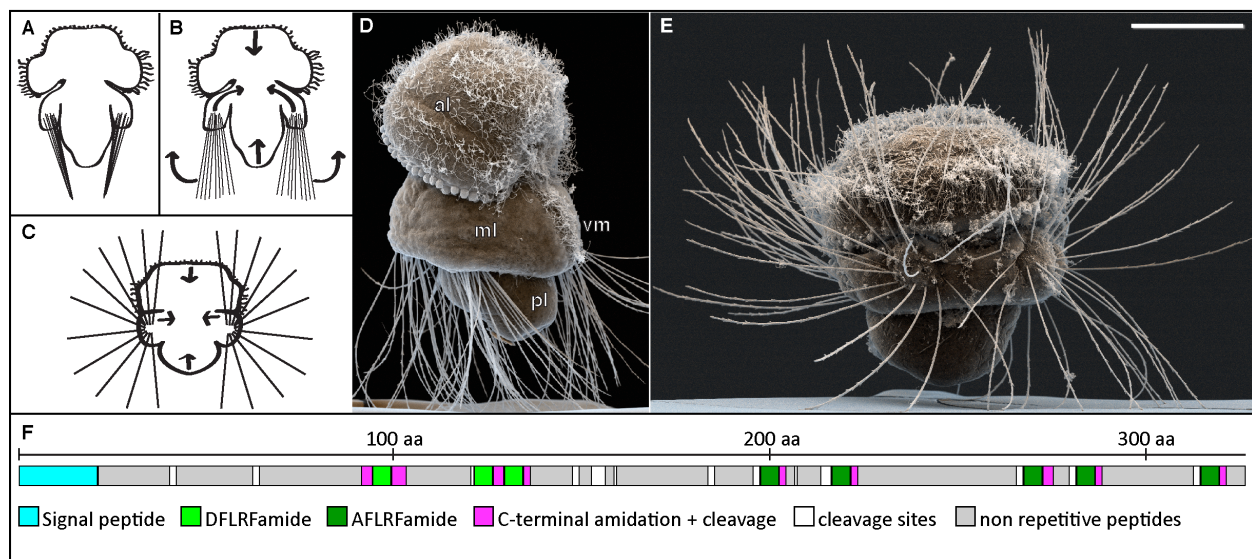

**Fig.1: Defense reaction and FLRFamide prepropeptide of the *T. transversa* larvae.** A-C sketch, D-E SEM photographs, anterior up, F sketch. A larva in relaxed stance during normal swimming; B non contracted larva that begins to spread its chaetae; C larva in defense stance with outspread chaetae; D non-contracted competent larva; E contracted competent larva with outspread chaetae. F schematic representation of *T. transversa* FLRFamide prepropeptide. al anterior lobe, ml mantle lobe, pl pedicle lobe, vm ciliated ventral mid line. Scale bar: 50  $\mu$ m

We discovered a FLRFamide prepropeptide sequence in the transcriptome of *T. transversa*. The FLRFamide precursor contains a signal peptide, three copies of DFLRFamide and five copies of AFLRFamide, partially separated by intermediate sequences (fig.1 F). When we exposed larvae to synthetic FLRFamide, they contracted lengthwise, spread out their chaetae and sank down slowly. Both predicted peptides, DFLRFamide and AFLRFamide, caused the same behavior. When exposed to 50 nmol/l DFLRFamide all larvae showed initial signs of contraction, indicated by their chaetae bundles being slightly fanned out while still pointing in a posterior direction (fig.1 B,D). About half of the larvae continued swimming while the other half started to sink slowly on the bottom. An increase in peptide concentrations lead to an overall increase in contraction, resulting in a stronger spreading of the chaetae and more larvae sinking down. A maximum contraction of all larvae, with their body being completely surrounded by chaetae was observed at concentrations of 500-750 nmol/l DFLRFamide. When we removed the peptides by exchanging the medium with fresh seawater, all larvae returned to normal swimming behavior. Continuous exposure for about 2 hours led to a desensitization and the larvae resumed normal swimming without removing the peptides. When the larvae were desensitized by continuous exposure to DFLRFamide, they became also insensitive to AFLRFamide and vice versa.

Taken together we found *T. transversa* larvae show a continuing behavior which is similar to their startle response when we exposed them to one of the neuropeptides encoded on the endogenously expressed FLRFamide precursor.

### FLRFamide causes sinking of larvae independent from the protrusion of their chaetae

One part of the defense behavior of *T. transversa* larvae is a slow downward sinking. This reaction can already be observed in early larvae (sFig.1 E) before they develop long chaetae. Due to the shape of the larvae and the lack of a clearly restricted prototroch it was not possible to directly record the ciliary beating. However, since their larval locomotion is purely driven by ciliary beating, we hypothesize that FLRFamide influences the ciliary movement. To measure the swimming behavior in an unbiased manner, we recorded the position of freely swimming larvae in vertical columns and compared it to the position of larvae after exposure to DFLRFamide (fig.2 A). To test the possibility that the sinking is caused by an increase in the water drag due to the protruded chaetae, we also recorded early larva that do not have long chaetae yet but already express FLRFamide in the apical lobe (sFig.1 D). Both stages showed a sinking behavior that shifted the distribution of the larvae in the water column down, compared to the controls (fig.2 B).

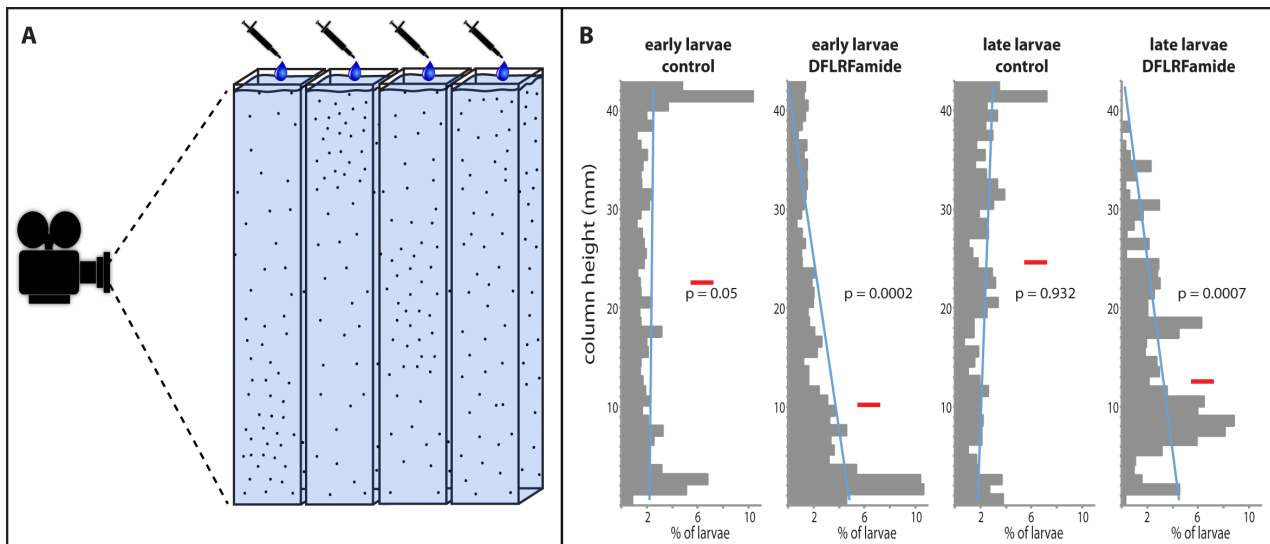

**Fig.2: Influence of FLRFamide on the vertical distribution of early and late larvae.** **A** Schematic experimental setup to compare the vertical distribution of larvae under different conditions in parallel. **B** Vertical distribution of early and late larvae in the water column and the effect of 5  $\mu\text{mol/l}$  DFLRFamide. Red bar shows average level of swimming height, p values are calculated for difference in distribution of larvae in upper versus lower half of the column (2-tailed, unpaired t-test), blue line is the estimated trend line (not statistically supported). Distribution was measured over a period of 5 seconds, about 1 minute after exposure to peptide.

### Modified peptides trigger the defense behavior at different concentration thresholds

We tested at which concentration modified peptides induce the contraction that leads to the erection of the chaetae, with 50  $\mu\text{mol/l}$  as a cutoff for the maximum concentration (tab.1, sTab.1 ). The larvae were most sensitive to DFLRFamide and showed full contraction (fig.1 C,E), sinking and very slow movement on the bottom of the dish at concentrations between 500 nmol/l and 750 nmol/l (batch dependent). Further increasing the concentration did not lead to an obvious increase in the reaction. AFLRFamide showed to be slightly less effective by triggering full contraction of all larvae between 1 and 1.5  $\mu\text{mol/l}$ .

The reduced peptide sequence FLRFamide showed to be effective at 3  $\mu\text{mol/l}$ . Changing the amidated C-terminal phenylalanine to an amidated tryptophan reduced the effectiveness by about 10-fold, with a minimum necessary concentration of 7.5  $\mu\text{mol/l}$  of DFLRWamide or 20  $\mu\text{mol/l}$  of AFLRWamide. Changing the C-terminal phenylalanine to the non-aromatic leucine only led to a very weak contraction in some of the larvae at 50  $\mu\text{mol/l}$  DFLRLamide (fig.1 B) whereas 50  $\mu\text{mol/l}$  AFLRLamide gave no reaction at all. Reducing the sequence to the three C-terminal amino acids LRFamide also didn't lead to any contraction; neither did any of the other non-related peptides that we tested. (The full list of tested peptides is given in sTab.01). The overall most effective versions were the ones that are encoded on the pro-peptide sequence, DFLRFamide and AFLRFamide. The reduced peptide FLRFamide was slightly less effective and a modification of the amidated C-terminus reduced the effectiveness even more.

**Tab.1:** Necessary peptide concentrations to evoke larval defense stance compared to  $EC_{50}$  values of receptor activation.

| peptide           | necessary concentration to induce full contraction | $EC_{50}$ receptor assay |
|-------------------|----------------------------------------------------|--------------------------|
| <b>DFLRFamide</b> | 0.625 $\mu\text{mol/l}$                            | 11.2 nmol/l              |
| <b>AFLRFamide</b> | 1.5 $\mu\text{mol/l}$                              | 12.4 nmol/l              |
| <b>FLRFamide</b>  | 3 $\mu\text{mol/l}$                                | 33.2 nmol/l              |
| <b>DFLRWamide</b> | 8.75 $\mu\text{mol/l}$                             | 0.9 $\mu\text{mol/l}$    |

### Identification of the *T. transversa* FaRP receptor

Based on BLAST e-value similarities and cluster analysis we tested four receptor candidates for their activation by FLRFamide (fig.3 A). One candidate belongs to a cluster of receptors that includes the deorphanized *P. dumerilii* FMRFamide receptor [44] with related sequences in all major bilaterian groups including Xenacoelomorpha (fig.3 A "I"). The second candidate belongs to the luqin receptors (fig.3 A "II"). The third candidate belongs to a group of related receptors with unknown ligand (fig.3 A "III") and the fourth one belongs to a group that shows similarities with the deorphanized *Drosophila melanogaster* FMRFamide and the *P. dumerilii* NKY receptors (fig.3 A "IV"). Transcriptome searches for an FMRFamide gated ion channel (FaNaCh) as it was identified in molluscs did not reveal any orthologs in *T. transversa*, even when using FaNaCh orthologs that were identified in the brachiopods *Lingula anatina* and *Novocrania anomala*.

To test whether FLRFamide is the ligand of one of these receptors, we tested their activation by DFLRFamide in transfected CHO-K1 cells. This first test showed that only the candidate that is related to the previously deorphanized *P. dumerilii* FMRFamide-receptor was activated by 1  $\mu\text{mol/l}$  DFLRFamide but none of the other candidates. We called this GPCR the FLRFamide receptor. Since DFLRFamide already triggered the defense stance at concentrations below 1  $\mu\text{mol/l}$  in the behavioral assay, we did not test the negative GPCR candidates at higher peptide doses. We further compared the luminescence response of FLRFamide receptor expressing CHO-K1 cells to 1  $\mu\text{mol/l}$  DFLRFamide, AFLRFamide, FLRFamide, DFLRWamide and DFLRLamide (fig.4 A). The two native forms DFLRFamide and AFLRFamide lead to the highest luminescence, followed by FLRFamide in a similar range. DFLRWamide gave a strongly decreased luminescence and the values of DFLRLamide were barely higher than the negative control.

Dose response curves were recorded for DFLRFamide, AFLRFamide, FLRFamide and DFLRWamide (fig.4 B) and  $EC_{50}$  values (half maximal effective concentration) were determined for each peptide.

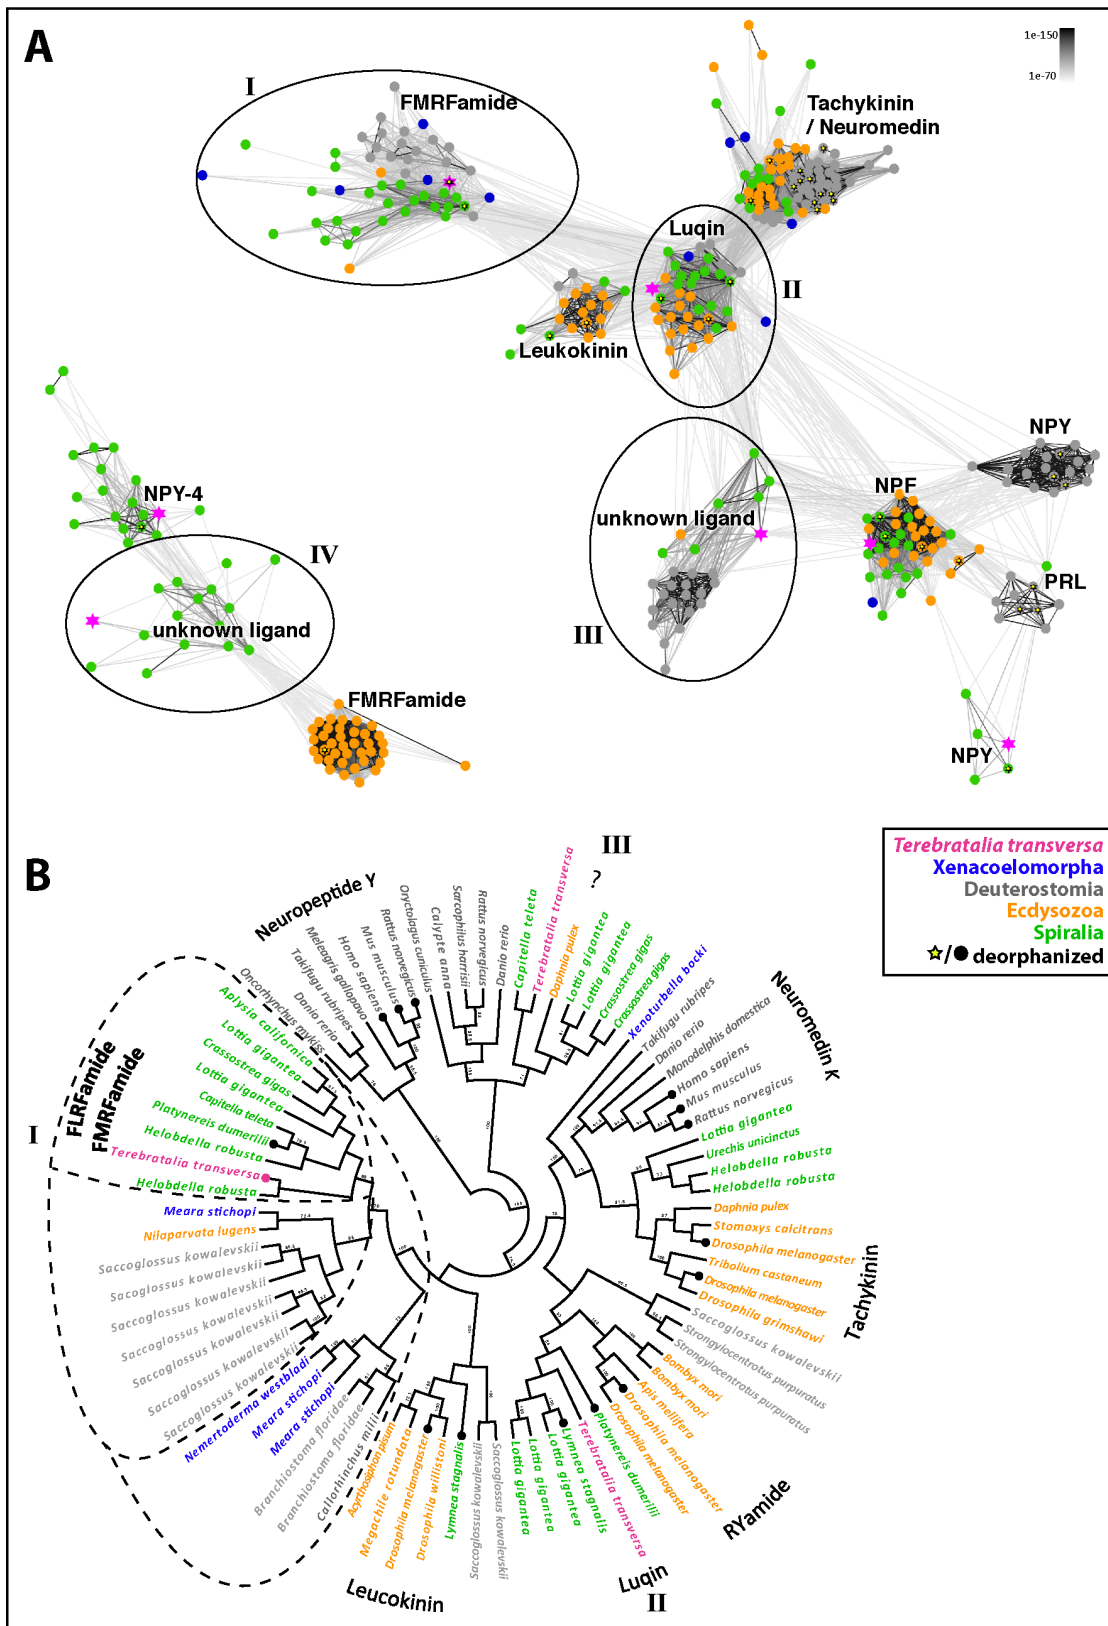

**Fig.3: Phylogeny of the *T. transversa*-FLRFamide receptor.** **A** Clustermap of metazoan neuropeptide GPCRs that show connections to FMRFamide receptors. Connections correspond to blastp connection with p-values <math>< 1e-70</math>. Groups that include the receptors I-IV that were tested for activation by FLRFamide are encircled. NPY neuropeptide Y, NPF neuropeptide F, PRL prolactin releasing peptide. **B** Cladogram of neuropeptide GPCRs that showed connections in the clustermap to the *T. transversa* FLRFamide receptor (I). The dashed lines indicate receptor groups related to the *Terebratalia* FLRFamide receptor. Branches with filled circle at the end indicate a receptor that was deorphanized in a previous study.



DFLRFamide and AFLRFamide showed  $EC_{50}$  values in a similar range ( $1.12E-08$  and  $1.24E-08$  mol/l). The  $EC_{50}$  value for FLRFamide was about three times higher ( $3.32E-08$  mol/l) and the one for DFLRWamide was the highest of all tested peptides ( $9.06E-07$  mol/l). The  $EC_{50}$  values are listed in table 1, together with the concentrations that were necessary to trigger the defense stance in the behavioral assay.

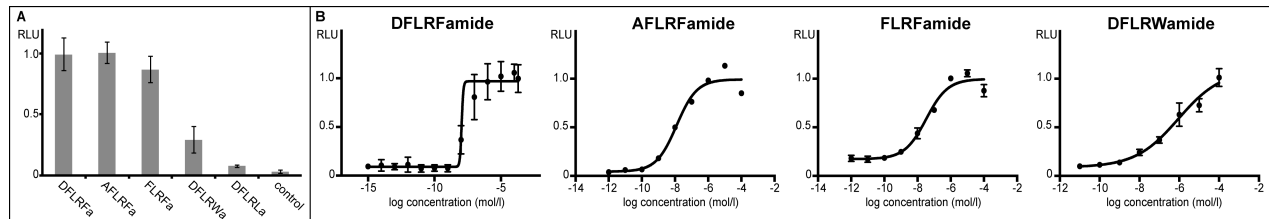

**Fig.4: Luminescence response of *T. transversa*-FLRFamide receptor expressing CHO-K1 cells to different peptides.** **A** Relative luminescence of *T. transversa*-FLRFamide receptor expressing cells after exposure to different peptides with a fixed concentration of 1 μmol/l. **B** Dose response curves of *T. transversa*-FLRFamide receptor expressing cells to different concentrations of DFLRFamide, AFLRFamide, FLRFamide and DFLRWamide. Luminescence values are given relative to maximum luminescence (max = 1). RLU relative luminescence.

After we deorphanized the FLRFamide receptor, we tested its phylogenetic relationship to the receptors that showed connections in the cluster analysis (fig.3 A "I-III"). We did not include the unrelated *T. transversa* orphan receptor that is related to the insect FMRFamide and trochozoan NKY receptors (fig.3 A "IV"). The *T. transversa* FLRFamide receptor is directly related the previously deorphanized *P. dumerilii* FMRFamide receptor and several orphan receptors of other trochozoan (fig.3 B). Orthologs to these trochozoan FMRFamide/FLRFamide receptors were found in the insect *Nilaparvata lugens*, the hemichordate *Saccoglossus kowalevskii* and the xenacoelomorph *Meara stichopi*. A third related group includes orphan receptors from the cephalochordate *Branchiostoma floridae*, the vertebrate *Callorhinchus milii* and the xenacoelomorphs *M. stichopi* and *Nemertoderma westbladi*. These receptors form a fully supported group of neuropeptide GPCRs with homologs in all major bilaterian clades that is well separated from other neuropeptide GPCR groups. (Fig.3 B)

Taken together we discovered that the *T. transversa* FLRFamide receptor belongs to an ancient neuropeptide receptor group and is efficiently activated by the two peptides AFLRFamide and DFLRFamide that are encoded on the *T. transversa* prepropeptide sequence.

### **In Situ Hybridization and Immunohistochemistry show localization of peptide receptor in trunk musculature and apical prototroch region**

The FLRFamide precursor has several expression domains within the apical lobe around the neuropile, and two domains on the ventral side at the anterior border of the mantle lobe (fig.5 A,B,E; sFig.1 B,C). The number of domains in the apical lobe varied between three and five (fig.5 A,B) and each domain consists of approximately three to seven cells. The combined *in situ* hybridization with *tropomyosin* as a marker for the musculature shows that the FLRFamide precursor expression in the mantle lobe is adjacent to the ventral side of the trunk musculature (fig.5 E). The FLRFamide receptor is expressed in a left and a right stripe in the trunk musculature (fig.5 B,C; sFig.1 A) as well as in the musculature that projects and surrounds the chaetae sacs (fig.5 D; sFig.1 A). Apart from the expression in the musculature

the receptor is also expressed in the apical lobe in a broad stripe underneath the ciliated prototroch (fig.5 B,C; sFig.1 A).

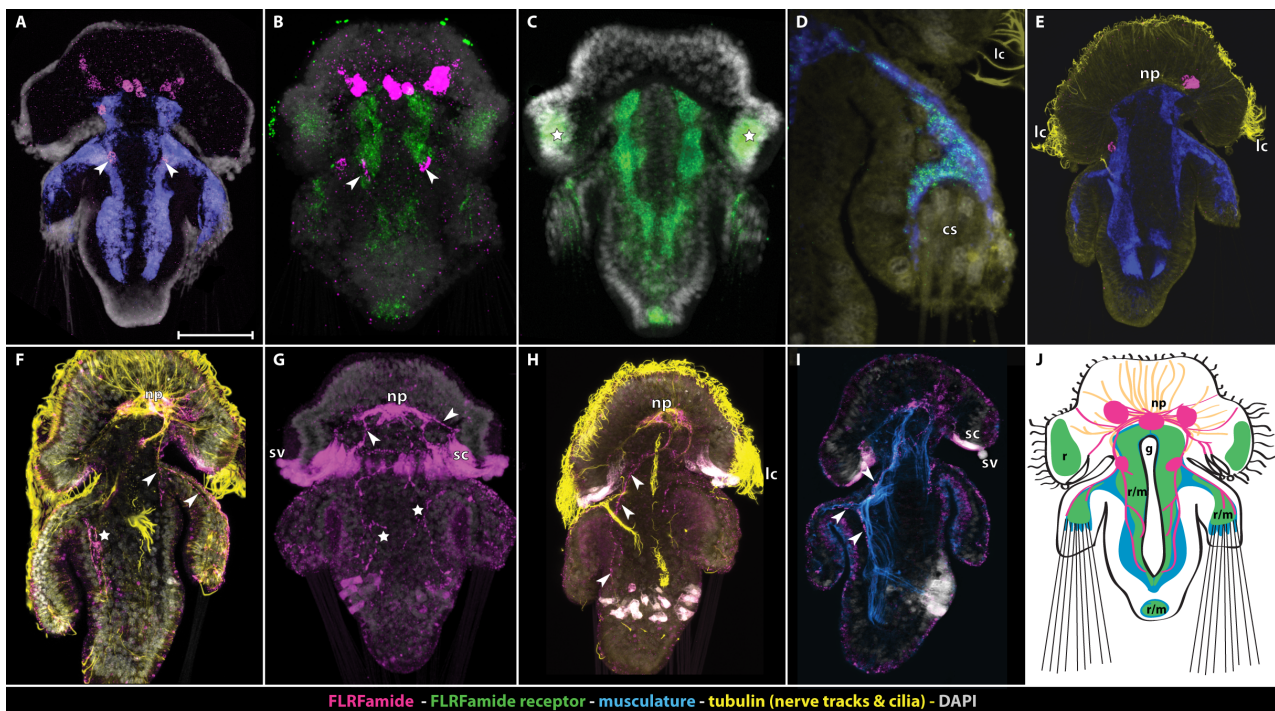

**Fig.5: *In situ* hybridization and immunostainings of *Terebratalia*-FLRFamide, *Terebratalia*-FLRFamide receptor, musculature and tubulin. A-E *in situ* hybridization; F-I immunohistochemistry; A-D,G,J front view; E,F,H,I side view, ventral side left. A *FLRFa* and *tropomyosin* expression, arrows show *FLRFa* expression in mantle lobe. B *FLRFa* and *FLRFa* receptor expression, arrows show *FLRFa* expression in mantle lobe. C *FLRFa* receptor expression, stars show expression underneath prototroch. D *tropomyosin* and *FLRFa* receptor co-expression around chaetae sacks. E *FLRFa* and *tropomyosin* expression. F *FLRFa* and tubulin staining, star shows branching of *FLRFa* positive nerves inside ventral trunk area, arrows show branching of dorsal *FLRFa* positive trunk-nerve towards chaetae sacks. G *FLRFa* staining, stars show branching of *FLRFa* positive nerves inside dorsal trunk area, arrows show projections into secretory cells underneath the prototroch. H *FLRFa* and tubulin staining, arrows show nerve projecting from neuropil into ventral part of the trunk. I *FLRFa* and actin staining, arrows show lining of the musculature by *FLRFamide*rgic nerves, projecting into mantle and posterior part of the trunk. J Schematic drawing of *FLRFamide*rgic cells and nerves, *FLRFa* receptor and musculature. *cs* chaetae sacks, *g* gut, *lc* locomotory cilia of the prototroch, *m* musculature, *np* neuropil, *r* receptor, *sc* secretory cells, *sv* secretory vesicles. Color code is indicated at the bottom of the figure plate: Magenta *FLRFamide* (A,B,E precursor expression; F-I processed peptides), green *FLRFamide*-receptor, blue musculature (A,D,E *tropomyosin* expression; I actin staining), yellow nerve tracks and cilia.**

Since *in situ* hybridization only reveals where the peptide precursor is expressed, we used antibody staining to visualize the nerves that secrete the active peptides. The customized *FLRFamide* antibody revealed immuno-reactive longitudinal nerves that project from the apical neuropil (fig.5 F,G,H,I) pairwise along the ventral (fig. 7 H) and dorsal (fig. 7F) side into the trunk after branching off into the mantle towards the chaetae sacks at the border of the apical lobe and the mantle lobe (fig.5 F,H,I)). The nerves in the trunk are branching of strongly on the ventral side (fig.5 F,G) and are at least partially directly adjacent to the musculature (fig.5 I). The neuropile shows generally strong *FLRFamide* immunoreactivity with some nerves projecting towards the apical ciliary band and into the secretory cells that continue into secretory vesicles outside the apical lobe underneath the prototroch (fig.5 G,H,I). The secretory cells and vesicles themselves are prone to antibody trapping so no statement can be made whether they in fact

contain FLRFamide (compare fig.5 G without background subtraction and fig.5 F,H,I with background subtraction in secretory cells and secretory vesicles).

## Discussion

### **FLRFamide triggers two coherent reactions via an ancient FaRP receptor**

The receptor deorphanization and phylogenetic analysis shows that the *Terebratalia* FLRFamide receptor belongs to the ancient FaRP-GPCR group with closely related trochozoan GPCRs that include the deorphanized *P. dumerilii* FMRFamide receptor [44] and related orphan GPCRs in all major bilaterian groups (fig.3). The comparable sensitivity to different peptide modifications of the larvae in the behavioral assay and the EC<sub>50</sub> values of the receptor cell assay suggests that the larval response is triggered via the FLRFamide receptor. The expression of the FLRFamide receptor in the longitudinal trunk musculature and the musculature adjacent to the chaetae sacks in the mantle supports a direct mode of signaling whereby FLRFamide directly triggers the protrusion of the chaetae by inducing a muscle contraction. The expression of the receptor in a broad stripe underneath the ciliary band and the sinking of early and late larva, independent of the presence or absence of chaetae, also supports a direct effect of FLRFamide on the ciliated cells to induce the sinking behavior. While a direct influence of FMRFamide on the ciliary movement of trochozoan larvae has already been suggested before [25, 26], the combination of this reaction with the muscular contraction observed in the *T. transversa* larval startle response consists of two different behavioral actions.

### **The advantage of coherent sub-reactions during *T. transversa* defense behavior and their control by a single peptide**

Neuropeptides are considered to be ancient signaling molecules that are used in complex as well as simple nervous systems and are even present in Placozoa that lack neurons entirely [30, 62]. There are a few examples of complex behaviors that involve coherent sub-reactions like insect ecdysis or feeding, which are known to deploy single neuropeptides to act on several targets as a form of master-regulator [17-21]. When a single neuropeptide controls the erection of chaetae and sinking, it might coordinate the startle reaction independent from a direct neuronal wiring between these two structures.

While many zooplankton organisms escape potential predators by a sudden increase in velocity, some species have been observed to use passive sinking as an efficient escape strategy instead [3, 63]. Passive sinking seems efficient for slow animals to escape quicker predators such as copepods that do not detect their prey by vision but by sensing water disturbance [3, 11, 64]. It has been described that other brachiopod and annelid larvae seem to have a similar startle behavior as *T. transversa* [12-16]. Direct observations showed that tiny fishes spit out *Sabellaria* larvae with their spines erected [15] and experimental data showed that *Sabellaria* larvae with long chaetae have a higher survival rate compared to younger larvae without chaetae when exposed to different predators [14]. The combination of a passive sinking behavior while actively erecting chaetae might thus increase the chance to escape different predators when compared to either only showing sinking behavior or a protrusion of chaetae.

Our results demonstrate a case in which a single receptor-ligand pair can trigger two coherent reactions that integrate evolutionary novelties such as trochozoan chaetae [52] and ancient traits such as ciliary based locomotion [65] into the *T. transversa* larval startle behavior.

### **FaRP receptor-ligand pair was redeployed several times during trochozoan evolution**

The conserved receptor ligand pair in *P. dumerilii* and *T. transversa* stands in contrast to the various actions that FMRFamide can have in trochozoans. Several studies on trochozoan larvae have shown that FMRFamide like immuno-reactive nerves can be associated with several structures in a single animal and often include a combination of the apical organ, ciliary bands and the musculature, which would suggest different regulatory roles [39-41, 66-68]. However, in this context it is important to mention that antibodies against FMRFamide strongly cross-react with other peptides ending in RFamide, even within the same specimen [69, 70]. Inter-species comparisons of such labeled neurons across larger evolutionary distances are thus problematic. The cross-reactivity of polyclonal FMRFamide antibodies has even led to the discovery of new peptides in the past [71, 72] and the C-terminal ending RFamide is part of many different neuropeptides [30, 70, 73, 74]. Only a few experimental studies exist on the effect of FMRFamide on trochozoan larvae and those focus on the regulation of the ciliary-based locomotion, which ultimately influences the vertical swimming direction [24-26]. In the veliger larvae of *Tritia obsoleta* it has been observed that FMRFamide induces twitching of the velum that results in ciliary arrests while contracted [24]. Many studies on adult trochozoans show diverse effects of FMRFamide on various muscles [33-36] and further taxon-specific functions such as osmoregulation [75], chromatophore expansion [76] or suppression of salivary gland activity [77]. Experiments on different adult bivalves showed a taxon specific up- or down regulation of the heartbeat by FMRFamide [32] and the experiments on trochozoan larvae showed a taxon specific up- or down regulation of the ciliary beating [24-26]. The various taxon specific effects and association with different tissues suggest that the FaRP receptor-ligand pair proved to be generally useful as a regulating signaling system and was likely redeployed several times during trochozoan evolution.

## **Supporting material and data accession**

Sequences of the here newly described genes and accession numbers of published sequences that were used in this study are listed in the supplementary material. Pictures of chromogenic *in situ* hybridization and a SEM picture of an early larva are shown in sFig.1. A list of tested peptides is given in sTab.1.

## **Acknowledgements**

We want to thank Chema Martin Duran, Bruno Vellutini, Carmen Andrikou and Yale Passamaneck for helping with animal collection, spawning and fixation and Kevin Pang for reading the manuscript. The generous help of the “Centennial” crew and the administration of the Friday Harbor Laboratories, WA, USA made the animal collection and laboratory work possible. We further thank Jürgen Berger from the Max-Planck-Institute for Developmental Biology (Tübingen, Germany) for taking the beautiful SEM pictures of the larvae. This research was supported by the FP7-PEOPLE-2012-ITN grant no. 317172

“NEPTUNE” and received further support by the DFG - Deutsche Forschungsgemeinschaft to GJ (Reference no. JE 777/3-1).

## References

1. Herzog, Q. and C. Laforsch, *Modality matters for the expression of inducible defenses: introducing a concept of predator modality*. BMC Biol, 2013. **11**: p. 113.
2. Higginson, A.D. and G.D. Ruxton, *Adaptive changes in size and age at metamorphosis can qualitatively vary with predator type and available defenses*. Ecology, 2010. **91**(9): p. 2756-2768.
3. Ohman, M.D., *Behavioral-Responses of Zooplankton to Predation*. Bulletin of Marine Science, 1988. **43**(3): p. 530-550.
4. Vaughn, D. and J.D. Allen, *The peril of the plankton*. Integr Comp Biol, 2010. **50**(4): p. 552-70.
5. Morgan, S.G., *Adaptive Significance of Spination in Estuarine Crab Zoeae*. Ecology, 1989. **70**(2): p. 464-482.
6. Petrussek, A., et al., *A "crown of thorns" is an inducible defense that protects Daphnia against an ancient predator*. Proceedings of the National Academy of Sciences of the United States of America, 2009. **106**(7): p. 2248-2252.
7. Vaughn, D., *Predator-induced morphological defenses in marine zooplankton: A larval case study*. Ecology, 2007. **88**(4): p. 1030-1039.
8. Brandl, Z., *Feeding strategies of planktonic cyclopoids in lacustrine ecosystems*. Journal of Marine Systems, 1998. **15**(1-4): p. 87-95.
9. Echevarria, M.L., G.V. Wolfe, and A.R. Taylor, *Feast or flee: bioelectrical regulation of feeding and predator evasion behaviors in the planktonic alveolate Favella sp. (Spirotrichia)*. J Exp Biol, 2016. **219**(Pt 3): p. 445-56.
10. Gliwicz, M.Z., *Predation and the Evolution of Vertical Migration in Zooplankton*. Nature, 1986. **320**(6064): p. 746-748.
11. Kerfoot, W.C., *Combat between Predatory Copepods and Their Prey - Cyclops, Epischura, and Bosmina*. Limnology and Oceanography, 1978. **23**(6): p. 1089-1102.
12. Chuang, S.H., *Larval Development in Discinisca (Inarticulate-Brachiopod)*. American Zoologist, 1977. **17**(1): p. 39-53.
13. Nielsen, C., *The Development of the Brachiopod Crania (Neocrania) Anomala (Muller, O.F.) and Its Phylogenetic Significance*. Acta Zoologica, 1991. **72**(1): p. 7-28.
14. Pennington, J.T. and F.S. Chia, *Morphological and Behavioral Defenses of Trochophore Larvae of Sabellaria cementarium (Polychaeta) against 4 Planktonic Predators*. Biological Bulletin, 1984. **167**(1): p. 168-175.
15. Wilson, D.P., *The Larvae of the British Sabellarians*. Journal of the Marine Biological Association of the United Kingdom (New Series), 1929. **16**(01): p. 221-268.
16. Wilson, D.P., *The Larvae of Polydora ciliata Johnston and Polydora hoplura Claparède*. Journal of the Marine Biological Association of the United Kingdom, 1928. **15**(2): p. 567-603.
17. Hewes, R.S. and J.W. Truman, *The roles of central and peripheral eclosion hormone release in the control of ecdysis behavior in Manduca sexta*. J Comp Physiol A, 1991. **168**(6): p. 697-707.
18. Kim, Y.J., et al., *A command chemical triggers an innate behavior by sequential activation of multiple peptidergic ensembles*. Curr Biol, 2006. **16**(14): p. 1395-407.
19. Taghert, P.H. and M.N. Nitabach, *Peptide neuromodulation in invertebrate model systems*. Neuron, 2012. **76**(1): p. 82-97.
20. Truman, J.W., *Hormonal control of insect ecdysis: endocrine cascades for coordinating behavior with physiology*. Vitam Horm, 2005. **73**: p. 1-30.
21. Dailey, M.J. and T.J. Bartness, *Appetitive and consummatory ingestive behaviors stimulated by PVH and perifornical area NPY injections*. Am J Physiol Regul Integr Comp Physiol, 2009. **296**(4): p. R877-92.
22. Conzelmann, M., et al., *Conserved MIP receptor-ligand pair regulates Platynereis larval settlement*. Proc Natl Acad Sci U S A, 2013. **110**(20): p. 8224-9.
23. Williams, E.A., M. Conzelmann, and G. Jekely, *Myoinhibitory peptide regulates feeding in the marine annelid Platynereis*. Front Zool, 2015. **12**(1): p. 1.
24. Braubach, O.R., et al., *Neural control of the velum in larvae of the gastropod, Ilyanassa obsoleta*. J Exp Biol, 2006. **209**(Pt 23): p. 4676-89.

25. Conzelmann, M., et al., *Neuropeptides regulate swimming depth of Platynereis larvae*. Proc Natl Acad Sci U S A, 2011. **108**(46): p. E1174-83.
26. Penniman, J.R., M.K. Doll, and A. Pires, *Neural correlates of settlement in veliger larvae of the gastropod, Crepidula fornicata*. Invertebrate Biology, 2013. **132**(1): p. 14-26.
27. Schmidt-Rhaesa, A., S. Harzsch, and G. Purschke, *Structure & evolution of invertebrate nervous systems*. First edition. ed. 2016, Oxford ; New York, NY: Oxford University Press. xi, 748 pages.
28. D'Aniello, B., et al., *Neuroanatomical relationships between FMRFamide-immunoreactive components of the nervus terminalis and the topology of olfactory bulbs in teleost fish*. Cell and Tissue Research, 2016. **364**(1): p. 43-57.
29. Walker, R.J., S. Papaioannou, and L. Holden-Dye, *A review of FMRFamide- and RFamide-like peptides in metazoa*. Invert Neurosci, 2009. **9**(3-4): p. 111-53.
30. Jekely, G., *Global view of the evolution and diversity of metazoan neuropeptide signaling*. Proc Natl Acad Sci U S A, 2013. **110**(21): p. 8702-7.
31. Espinoza, E., et al., *A statistical view of FMRFamide neuropeptide diversity*. Mol Neurobiol, 2000. **21**(1-2): p. 35-56.
32. Painter, S.D. and M.J. Greenberg, *A Survey of the Responses of Bivalve Hearts to the Molluscan Neuropeptide Fmrfamide and to 5-Hydroxytryptamine*. Biological Bulletin, 1982. **162**(3): p. 311-332.
33. Lehman, H.K. and M.J. Greenberg, *The Actions of Fmrfamide-Like Peptides on Visceral and Somatic Muscles of the Snail Helix-Aspersa*. Journal of Experimental Biology, 1987. **131**: p. 55-68.
34. Krajniak, K.G. and M.J. Greenberg, *The Localization of Fmrfamide in the Nervous and Somatic Tissues of Nereis-Virens and Its Effects Upon the Isolated Esophagus*. Comparative Biochemistry and Physiology C-Pharmacology Toxicology & Endocrinology, 1992. **101**(1): p. 93-100.
35. Muneoka, Y. and H. Saitoh, *Pharmacology of Fmrfamide in Mytilus Catch Muscle*. Comparative Biochemistry and Physiology C-Pharmacology Toxicology & Endocrinology, 1986. **85**(1): p. 207-214.
36. Moulis, A., *The action of RFamide neuropeptides on molluscs, with special reference to the gastropods Buccinum undatum and Busycon canaliculatum*. Peptides, 2006. **27**(5): p. 1153-1165.
37. Norris, B.J. and R.L. Calabrese, *Identification of Motor Neurons That Contain a Fmrfamidelike Peptide and the Effects of Fmrfamide on Longitudinal Muscle in the Medicinal Leech, Hirudo-Medicinalis*. Journal of Comparative Neurology, 1987. **266**(1): p. 95-111.
38. Raffa, R.B. and C.P. Bianchi, *Further Evidence for a Neuromodulatory Role of Fmrfamide Involving Intracellular Ca-2+ Pools in Smooth-Muscle of Mytilus-Edulis*. Comparative Biochemistry and Physiology C-Pharmacology Toxicology & Endocrinology, 1986. **84**(1): p. 23-28.
39. Dyachuk, V. and N. Odintsova, *Development of the larval muscle system in the mussel Mytilus trossulus (Mollusca, Bivalvia)*. Dev Growth Differ, 2009. **51**(2): p. 69-79.
40. Helm, C., et al., *Owenia fusiformis - a basally branching annelid suitable for studying ancestral features of annelid neural development*. BMC Evol Biol, 2016. **16**(1): p. 129.
41. Hayschmidt, A., *The Larval Nervous-System of Polygordius-Lacteus Scheinder, 1868 (Polygordiidae, Polychaeta) - Immunocytochemical Data*. Acta Zoologica, 1995. **76**(2): p. 121-140.
42. van den Pol, A.N., *Neuropeptide transmission in brain circuits*. Neuron, 2012. **76**(1): p. 98-115.
43. Mirabeau, O. and J.S. Joly, *Molecular evolution of peptidergic signaling systems in bilaterians*. Proceedings of the National Academy of Sciences of the United States of America, 2013. **110**(22): p. E2028-E2037.
44. Bauknecht, P. and G. Jekely, *Large-Scale Combinatorial Deorphanization of Platynereis Neuropeptide GPCRs*. Cell Rep, 2015. **12**(4): p. 684-93.
45. Lingueglia, E., et al., *Cloning of the amiloride-sensitive FMRFamide peptide-gated sodium channel*. Nature, 1995. **378**(6558): p. 730-3.
46. Niu, Y.Y., et al., *Exploration of the Peptide Recognition of an Amiloride-sensitive FMRFamide Peptide-gated Sodium Channel*. J Biol Chem, 2016. **291**(14): p. 7571-82.
47. Perry, S.J., et al., *Neuronal expression of an FMRFamide-gated Na+ channel and its modulation by acid pH*. J Neurosci, 2001. **21**(15): p. 5559-67.
48. Cazzamali, G. and C.J. Gimmelikhuijzen, *Molecular cloning and functional expression of the first insect FMRFamide receptor*. Proc Natl Acad Sci U S A, 2002. **99**(19): p. 12073-8.
49. Meeusen, T., et al., *Identification in Drosophila melanogaster of the invertebrate G protein-coupled FMRFamide receptor*. Proc Natl Acad Sci U S A, 2002. **99**(24): p. 15363-8.
50. Hauser, F. and C.J. Gimmelikhuijzen, *Evolution of the AKH/corazonin/ACP/GnRH receptor superfamily and their ligands in the Protostomia*. Gen Comp Endocrinol, 2014. **209**: p. 35-49.
51. Froninckx, L., et al., *Neuropeptide GPCRs in C. elegans*. Front Endocrinol (Lausanne), 2012. **3**: p. 167.

52. Schiemann, S.M., et al., *Clustered brachiopod Hox genes are not expressed collinearly and are associated with lophotrochozoan novelties*. Proc Natl Acad Sci U S A, 2017. **114**(10): p. E1913-E1922.
53. Stricker, S.A. and C.G. Reed, *The Ontogeny of Shell Secretion in Terebratalia-Transversa (Brachiopoda, Articulata) .1. Development of the Mantle*. Journal of Morphology, 1985. **183**(3): p. 233-250.
54. Frickey, T. and A. Lupas, *CLANS: a Java application for visualizing protein families based on pairwise similarity*. Bioinformatics, 2004. **20**(18): p. 3702-4.
55. Larkin, M.A., et al., *Clustal W and Clustal X version 2.0*. Bioinformatics, 2007. **23**(21): p. 2947-8.
56. Keane, T.M., et al., *Assessment of methods for amino acid matrix selection and their use on empirical data shows that ad hoc assumptions for choice of matrix are not justified*. BMC Evol Biol, 2006. **6**: p. 29.
57. Guindon, S., et al., *New algorithms and methods to estimate maximum-likelihood phylogenies: assessing the performance of PhyML 3.0*. Syst Biol, 2010. **59**(3): p. 307-21.
58. Passamaneck, Y.J., A. Hejnal, and M.Q. Martindale, *Mesodermal gene expression during the embryonic and larval development of the articulate brachiopod Terebratalia transversa*. Evodevo, 2015. **6**: p. 10.
59. Hejnal, A., *In situ protocol for embryos and juveniles of Convolutriloba longifissura*. 2008.
60. Jekely, G. and D. Arendt, *Cellular resolution expression profiling using confocal detection of NBT/BCIP precipitate by reflection microscopy*. Biotechniques, 2007. **42**(6): p. 751-755.
61. Conzelmann, M. and G. Jekely, *Antibodies against conserved amidated neuropeptide epitopes enrich the comparative neurobiology toolbox*. Evodevo, 2012. **3**.
62. Nikitin, M., *Bioinformatic prediction of Trichoplax adhaerens regulatory peptides*. General and Comparative Endocrinology, 2015. **212**: p. 145-155.
63. Burdick, D.S., D.K. Hartline, and P.H. Lenz, *Escape strategies in co-occurring calanoid copepods*. Limnology and Oceanography, 2007. **52**(6): p. 2373-2385.
64. Williamson, C.E., *Behavioral Interactions between a Cyclopid Copepod Predator and Its Prey*. Journal of Plankton Research, 1983. **5**(5): p. 701-711.
65. Jekely, G., *Origin and early evolution of neural circuits for the control of ciliary locomotion*. Proc Biol Sci, 2011. **278**(1707): p. 914-22.
66. Dyachuk, V., A. Wanninger, and E.E. Voronezhskaya, *Innervation of Bivalve Larval Catch Muscles by Serotonergic and FMRFamide-like Neurons*. Acta Biologica Hungarica, 2012. **63**: p. 221-229.
67. Hindinger, S., T. Schwaha, and A. Wanninger, *Immunocytochemical studies reveal novel neural structures in nemertean pilidium larvae and provide evidence for incorporation of larval components into the juvenile nervous system*. Front Zool, 2013. **10**(1): p. 31.
68. Nezlin, L.P., *The golden age of comparative morphology: Laser scanning microscopy and neurogenesis in trochophore animals*. Russian Journal of Developmental Biology, 2010. **41**(6): p. 381-390.
69. Vilim, F.S., et al., *Distinct Mechanisms Produce Functionally Complementary Actions of Neuropeptides That Are Structurally Related But Derived from Different Precursors*. Journal of Neuroscience, 2010. **30**(1): p. 131-147.
70. Peymen, K., et al., *The FMRFamide-like peptide family in nematodes*. Frontiers in Endocrinology, 2014. **5**.
71. Dockray, G.J., et al., *A Novel Active Pentapeptide from Chicken Brain Identified by Antibodies to Fmrfamide*. Nature, 1983. **305**(5932): p. 328-330.
72. Price, D.A. and M.J. Greenberg, *The Hunting of the Farps - the Distribution of Fmrfamide-Related Peptides*. Biological Bulletin, 1989. **177**(2): p. 198-205.
73. Lopez-Vera, E., M.B. Aguilar, and E.P. Heimer de la Cotera, *FMRFamide and related peptides in the phylum mollusca*. Peptides, 2008. **29**(2): p. 310-7.
74. Dockray, G.J., *The expanding family of -RFamide peptides and their effects on feeding behaviour*. Exp Physiol, 2004. **89**(3): p. 229-35.
75. Salzet, M., et al., *FMRFamide-Related Peptides in the Sex Segmental Ganglia of the Pharyngobdellid Leech Erpobdella octoculata - Identification and Involvement in the Control of Hydric Balance*. European Journal of Biochemistry, 1994. **221**(1): p. 269-275.
76. Loi, P.K. and N. Tublitz, *Molecular analysis of FMRFamide- and FMRFamide-related peptides (FaRPS) in the cuttlefish Sepia officinalis*. J Exp Biol, 1997. **200**(Pt 10): p. 1483-9.
77. Bulloch, A.G.M., et al., *Fmrfamide Peptides in Helisoma - Identification and Physiological Actions at a Peripheral Synapse*. Journal of Neuroscience, 1988. **8**(9): p. 3459-3469.

## Supplementary Material

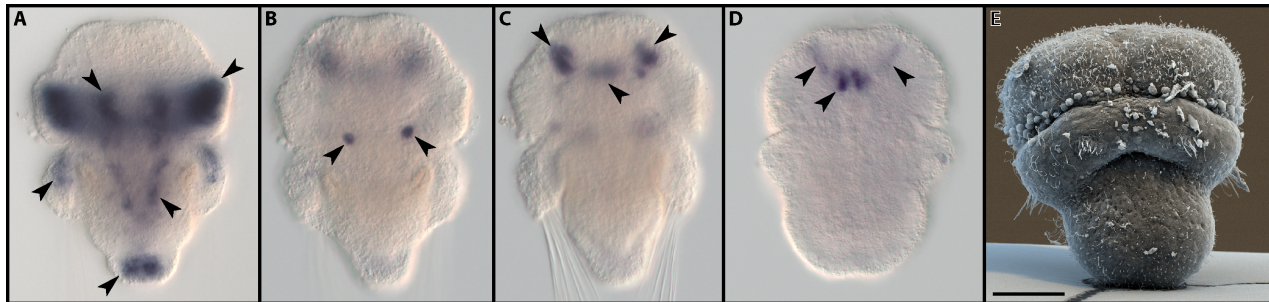

**Fig.1: FLRFamide peptide and receptor expression in *T.transversa* larvae.** **A-C** late larvae, *in situ* hybridization. Arrows indicate expression domains. **A** FLRFamide receptor expression. **B** ventral FLRFamide expression between apical and mantle lobe. (Same specimen as in C, but with a focus on the ventral side.) **C** FLRFamide expression in apical lobe. **D** early larva with FLRFamide expression in apical lobe. **E** SEM picture of early larva. Scale bar = 30  $\mu\text{m}$ .

**sTab.1: Peptide concentrations that lead to a contraction of the larvae**

| peptide                                                                                                                                                                                                                                              | batch 1                                                         | batch 2                               |
|------------------------------------------------------------------------------------------------------------------------------------------------------------------------------------------------------------------------------------------------------|-----------------------------------------------------------------|---------------------------------------|
| <b>DFLRFamide</b>                                                                                                                                                                                                                                    | 500 nM for full contraction                                     | 750 nM for full contraction           |
| <b>AFLRFamide</b>                                                                                                                                                                                                                                    | 1 $\mu\text{M}$ for full contraction                            | 2 $\mu\text{M}$ for full contraction  |
| <b>FLRFamide</b>                                                                                                                                                                                                                                     | 3 $\mu\text{M}$ for full contraction                            | 3 $\mu\text{M}$ for full contraction  |
| <b>DFLRWamide</b>                                                                                                                                                                                                                                    | 7.5 $\mu\text{M}$ for full contraction                          | 10 $\mu\text{M}$ for full contraction |
| <b>AFLRWamide</b>                                                                                                                                                                                                                                    | 20 $\mu\text{M}$ for full contraction                           | 20 $\mu\text{M}$ for full contraction |
| <b>DFLRYamide</b>                                                                                                                                                                                                                                    | 50 $\mu\text{M}$ for full contraction                           | 50 $\mu\text{M}$ for full contraction |
| <b>AFLRYamide</b>                                                                                                                                                                                                                                    | weak contraction in about 50% of the larvae at 50 $\mu\text{M}$ | no reaction at 50 $\mu\text{M}$       |
| <b>DFLRLamide</b>                                                                                                                                                                                                                                    | weak contraction in about 50% of the larvae at 50 $\mu\text{M}$ | no reaction at 50 $\mu\text{M}$       |
| <b>AFLRLamide</b>                                                                                                                                                                                                                                    | no reaction at 50 $\mu\text{M}$                                 | no reaction at 50 $\mu\text{M}$       |
| <b>LRFamide</b>                                                                                                                                                                                                                                      | no reaction at 50 $\mu\text{M}$                                 | no reaction at 50 $\mu\text{M}$       |
| <b>YMRFamide*</b>                                                                                                                                                                                                                                    | 10 $\mu\text{M}$ for full contraction                           | 15 $\mu\text{M}$ for full contraction |
| No contraction was observed at up to 50 $\mu\text{mol/l}$ of following peptides:<br>WQGMKMWamide, FLYamide, MDPSQFGYGIamide, Flamide, TDKCVPVamide, AAKAPSSSamide, NSDGLamide, LGamide, GWamide, RGWamide, YSLDGIGSGLIamide, QYMamide, CYLYDCINamide |                                                                 |                                       |

\*YMRFamide is the presumed homolog of FLRFamide in the brachiopod *Novocrania anomala*.

### *Terebratalia transversa* FLRFamide prepropeptide sequence

MNRSVLLVAVVASFLLDHSVGIYTSRYINPCSPWLKSTHFRKLCDESFWPSYGSQEKDMIPYKRGFFGGG  
 GEYGEPEGLSSSFVDEPYRGTIGKRDFLRF GKRRYDDNERSDQLEALNRVTRDFLRF GKRDFLRFGRSYN  
 LRGYSDNKRKHKMRKRRSIKNESDKPSSIESNDVYNKGALLRSDKKSMSAAKARDIKRAFLRFGR LQKEY  
 QQQDRKRAFLRF GKNTGINLDNRPTSDTKTETNSETDNNGSAKTVTNDHVIDNNDVSKRAFLRF GK KKCAS  
 CKRAFLRF GKSEKNLISSSNKSMKSSPLFGKEHTKRAFLRF GKSVNRE\*

signal peptide - cleavage site - C-terminal amidation site - FLRFamide





Tachykinin receptor 1, deorphanized] [FBpp0084873 *Drosophila melanogaster*, Tachykinin receptor 2, deorphanized] [ELT88896 *Capitella teleta*] [XP\_009016737 *Helobdella robusta*] [XP\_009054576 *Lottia gigantea*] [XP\_009060043 *Lottia gigantea*] [XP\_005090267 *Aplysia californica*] [EKC27293 *Crassostrea gigas*] [XP\_009027087 *Helobdella robusta*] [XP\_007899584 *Callorhynchus milii*] [XP\_009054574 *Lottia gigantea*] [BAO01094 *Nilaparvata lugens*] [XP\_002730513 *Saccoglossus kowalevskii*] [XP\_002596257 *Branchiostoma floridae*] [XP\_002734699 *Saccoglossus kowalevskii*] [XP\_002738788 *Saccoglossus kowalevskii*] [XP\_002731479 *Saccoglossus kowalevskii*] [XP\_002742045 *Saccoglossus kowalevskii*] [XP\_002596255 *Branchiostoma floridae*] [NP\_001161681 *Saccoglossus kowalevskii*] [XP\_002732003 *Saccoglossus kowalevskii*] [XP\_006812800 *Saccoglossus kowalevskii*] [XP\_009060304 *Lottia gigantea*] [XP\_003700723 *Megachile rotundata*] [XP\_002732001 *Saccoglossus kowalevskii*] [NP\_001161604 *Saccoglossus kowalevskii*] [NP\_001098693.1 *Takifugu rubripes*] [XP\_001342488.2 *Danio rerio*] [XP\_009064591.1 *Lottia gigantea*] [XP\_009067028.1 *Lottia gigantea*] [XP\_009050865.1 *Lottia gigantea*] [XP\_009064514.1 *Lottia gigantea*] [ELT99672.1 *Capitella teleta*] [XP\_009017792.1 *Helobdella robusta*] [XP\_009017796.1 *Helobdella robusta*] [XP\_009062052.1 *Lottia gigantea*] [XP\_008498708 *Calypte anna*] [Q1ACB1 *Oncorhynchus mykiss*] [F1R5V3\_DANRE *Danio rerio*] [E9HAW0\_DAPPU *Daphnia pulex*] [G3X054\_SARHA *Sarcophilus harrisii*] [G1NS97\_MELGA *Meleagris gallopavo*] [J9JKR1\_ACYPI *Acyrtosiphon pisum*] [B3XXN5\_BOMMO *Bombyx mori*] [B4MM03\_DROWI *Drosophila willistoni*] [K1PQW2\_CRAGI *Crassostrea gigas*] [B3XXN2\_BOMMO *Bombyx mori*] [H3ILX9\_STRPU *Strongylocentrotus purpuratus*] [H3ILY0\_STRPU *Strongylocentrotus purpuratus*] [H9K8U7\_APIME *Apis mellifera*] [Q8VHD7\_RAT *Rattus norvegicus*] [G1TPU6\_RABIT *Oryctolagus cuniculus*] [K1Q8V2\_CRAGI *Crassostrea gigas*] [D6WD17\_TRICA *Tribolium castaneum*] [Q6AWE5\_DROME *Drosophila melanogaster*] [I4IY86\_TAKRU *Takifugu rubripes*] [F1R3V0\_DANRE *Danio rerio*] [F7E6B1\_MONDO *Monodelphis domestica*] [B4JUW2\_DROGR *Drosophila grimshawi*] [Q94736\_STOCA *Stomoxys calcitrans*] [E9FUQ7\_DAPPU *Daphnia pulex*] [Q8T8D1\_UREUN *Tachykinin receptor*]
